# Supplementary material for: Gain-of-function Tibetan PHD2D4E;C127S variant suppresses monocyte function: A lesson in inflammatory response to inspired hypoxia
Source: PubMed Central journal article supplement — eBioMedicine. 2021 Jun 5;68:103418. doi: 10.1016/j.ebiom.2021.103418 (PMC8190441; doi:10.1016/j.ebiom.2021.103418), 2021-06-05

**Gain-of-function Tibetan PHD2<sup>D4E;C127S</sup> variant suppresses monocyte function:  
a lesson in inflammatory response to inspired hypoxia**

Bhattacharya S *et al.*

*Supplemental western blots: uncut blots of main Figures*

**Figure 4c: P-p65 and p65**

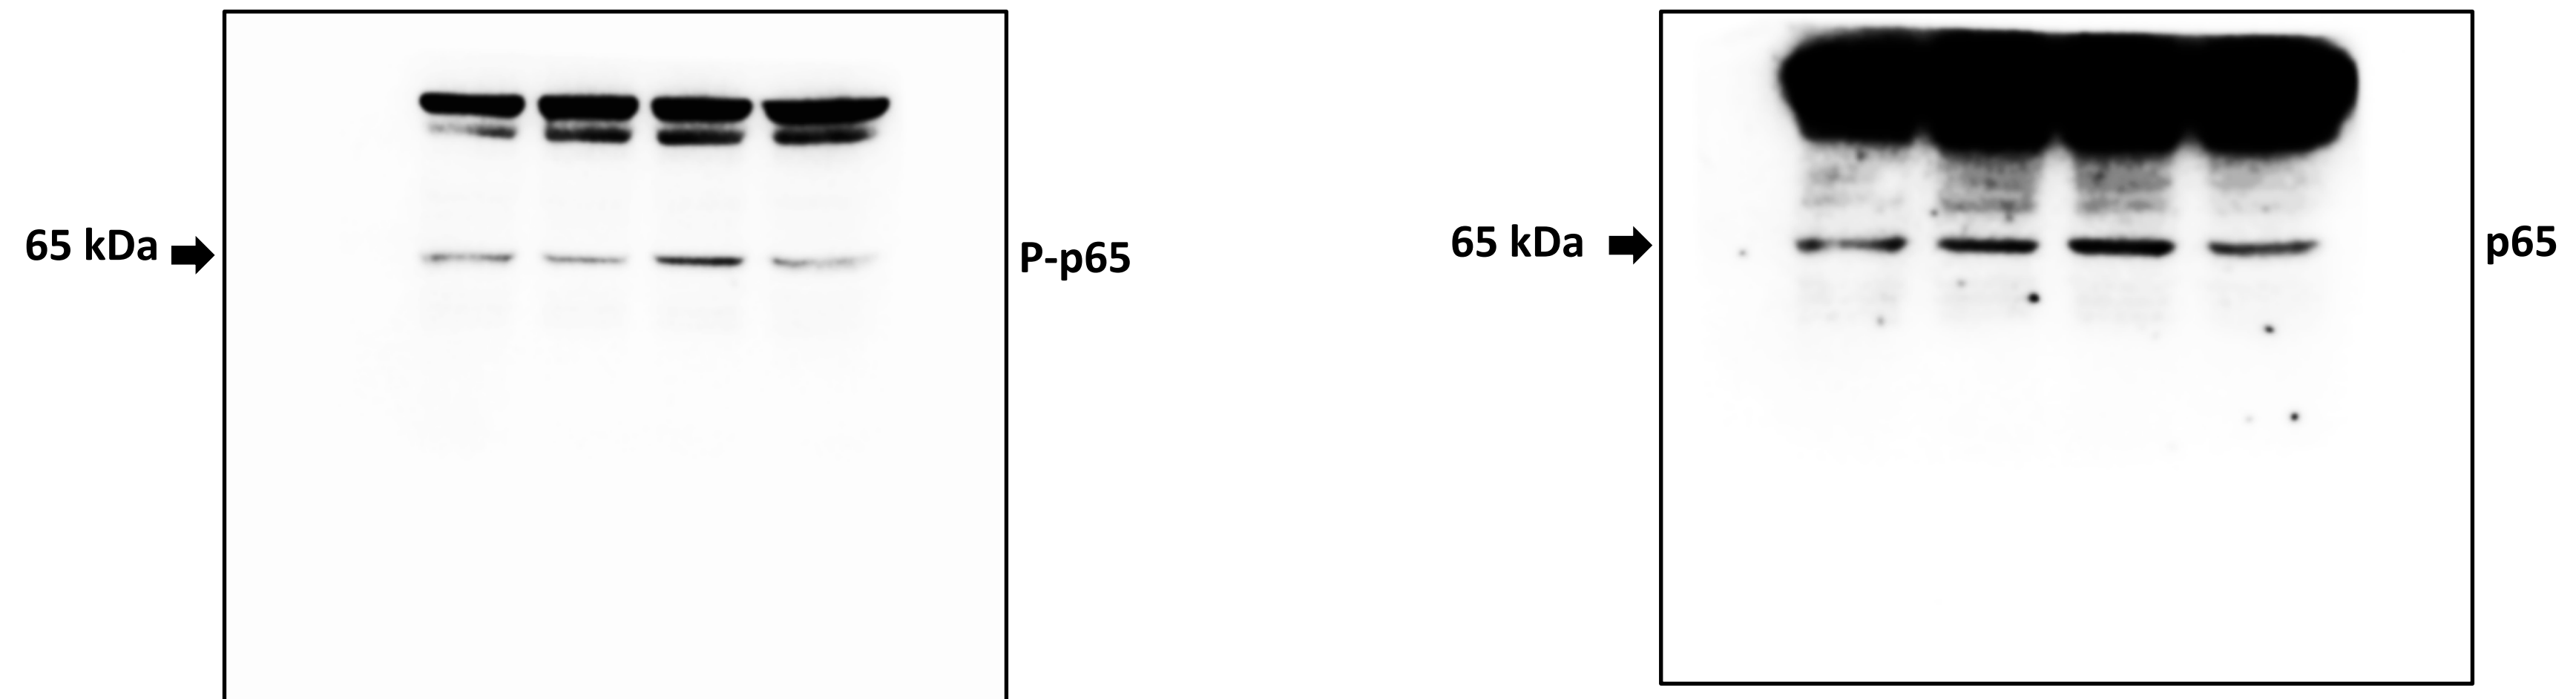

**Figure 4c: P-ATF-2 and ATF-2**

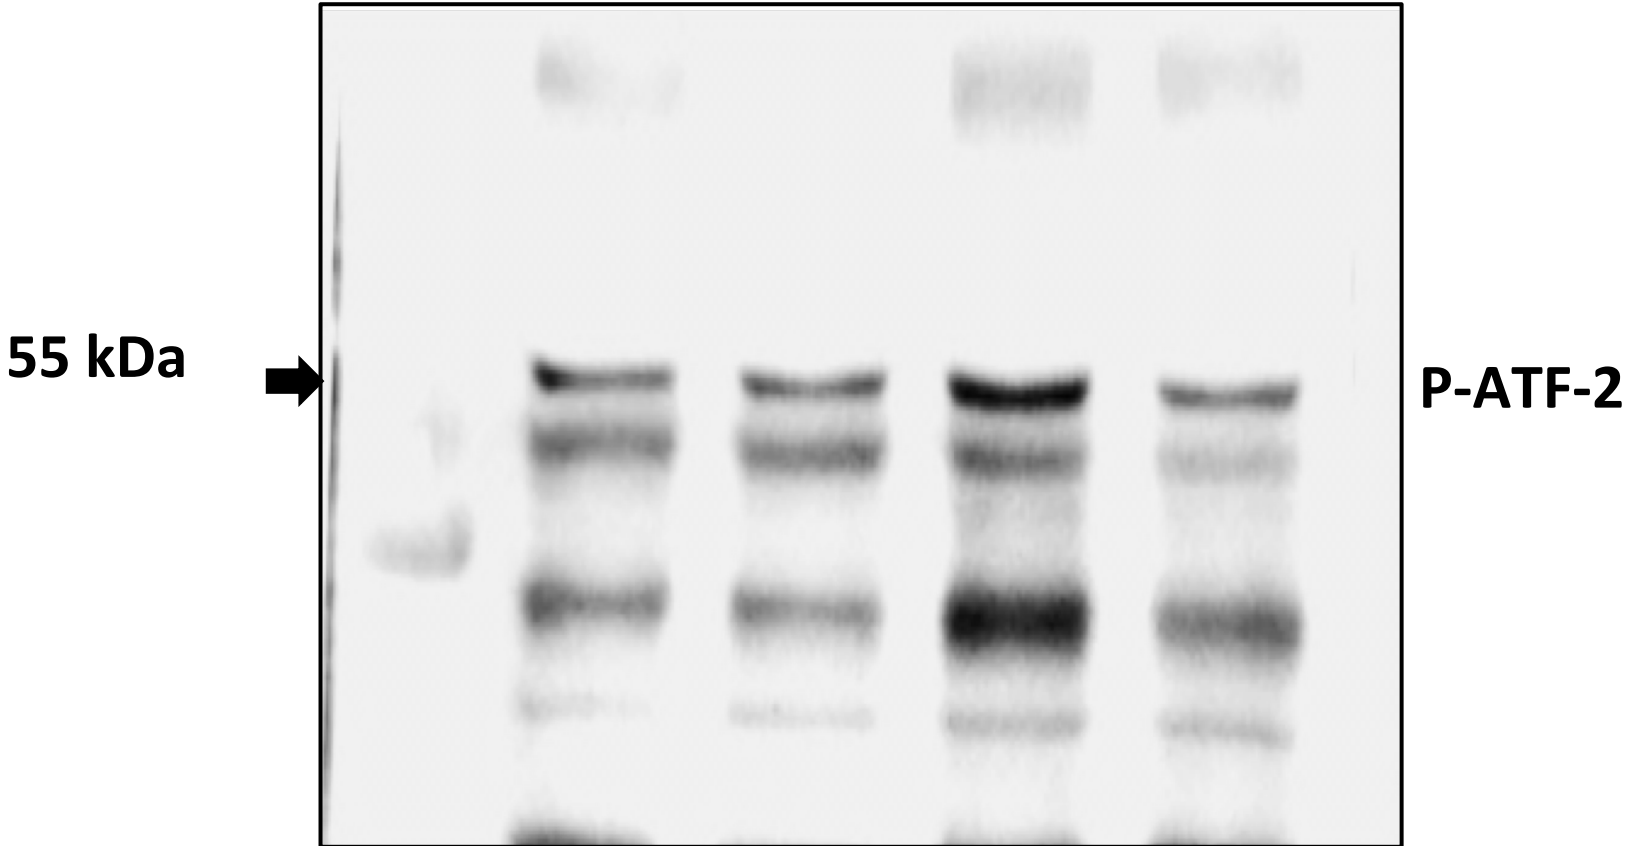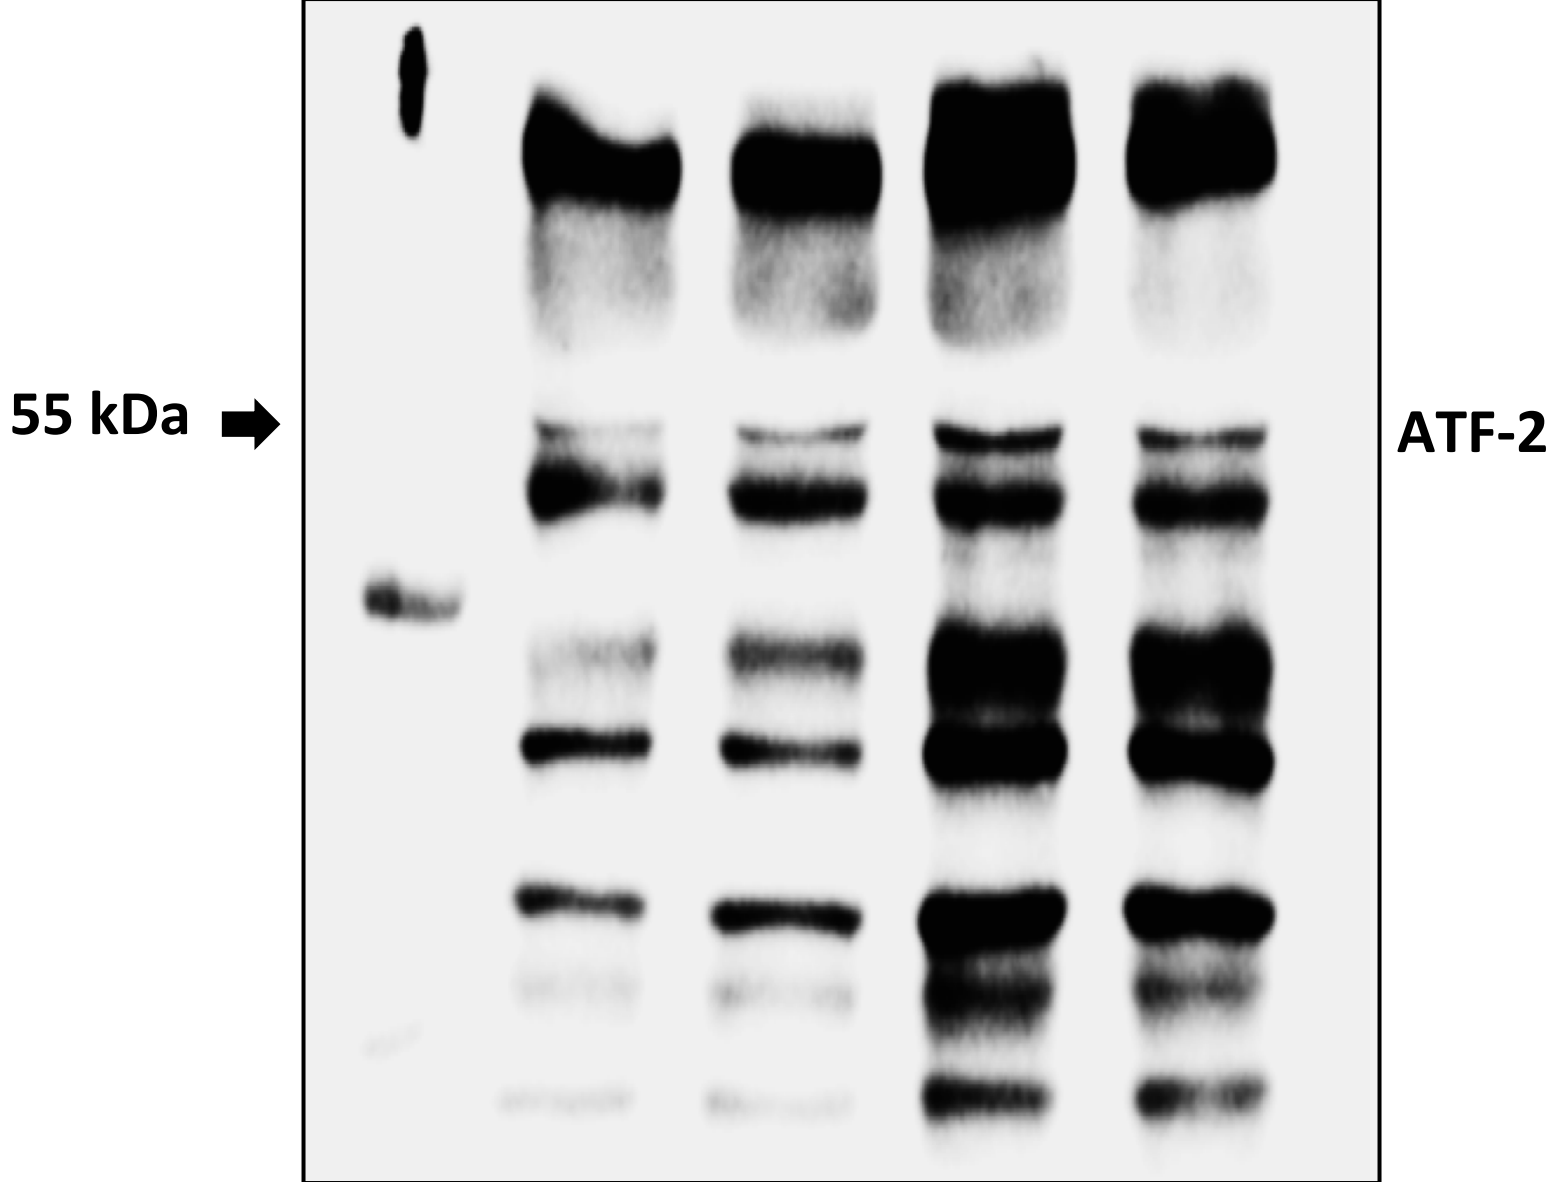

**Figure 4c: P-STAT-1 and STAT-1**

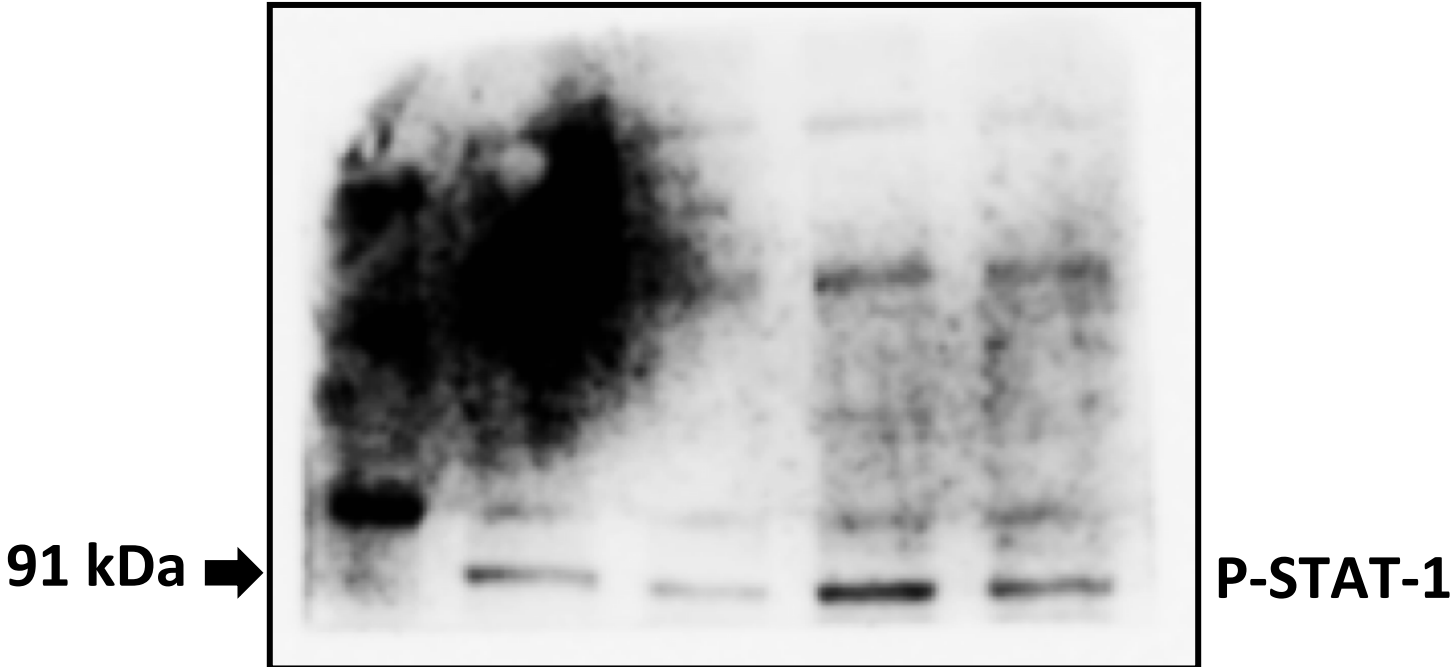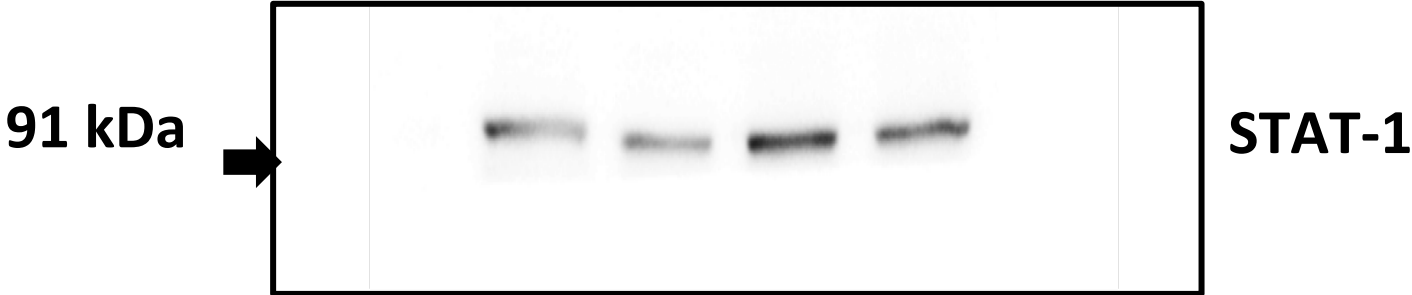

**Figure 4c: c-Jun and  $\alpha$ -Tubulin**

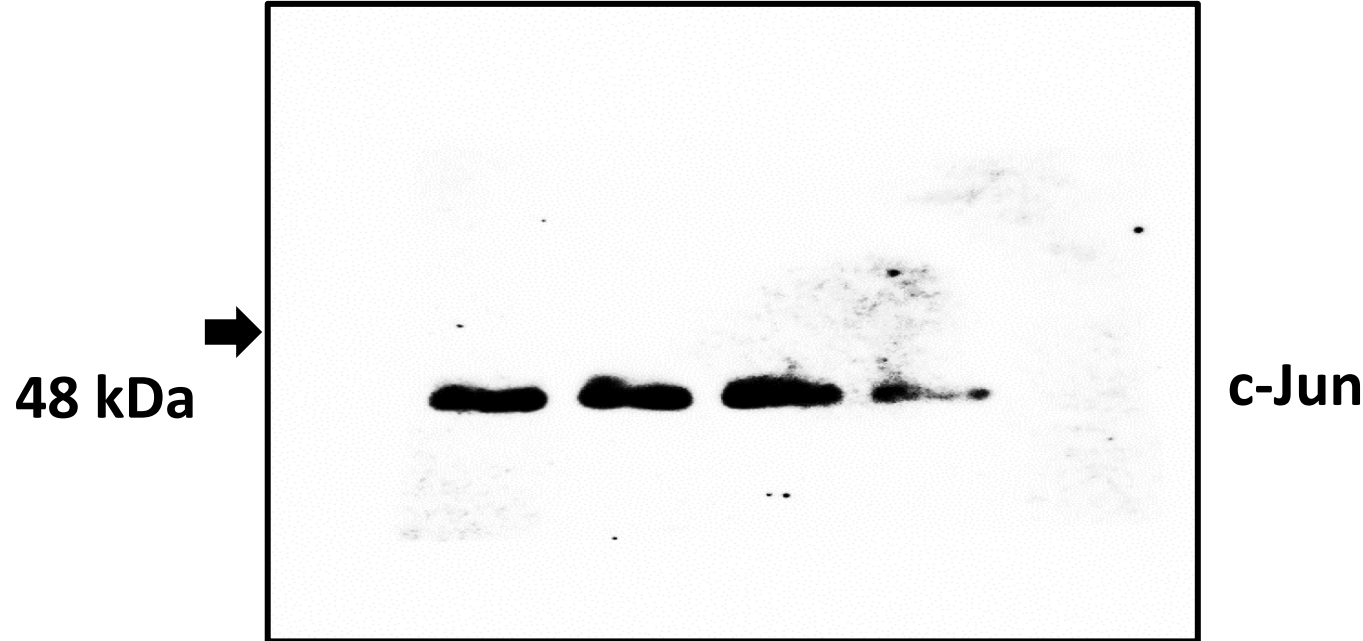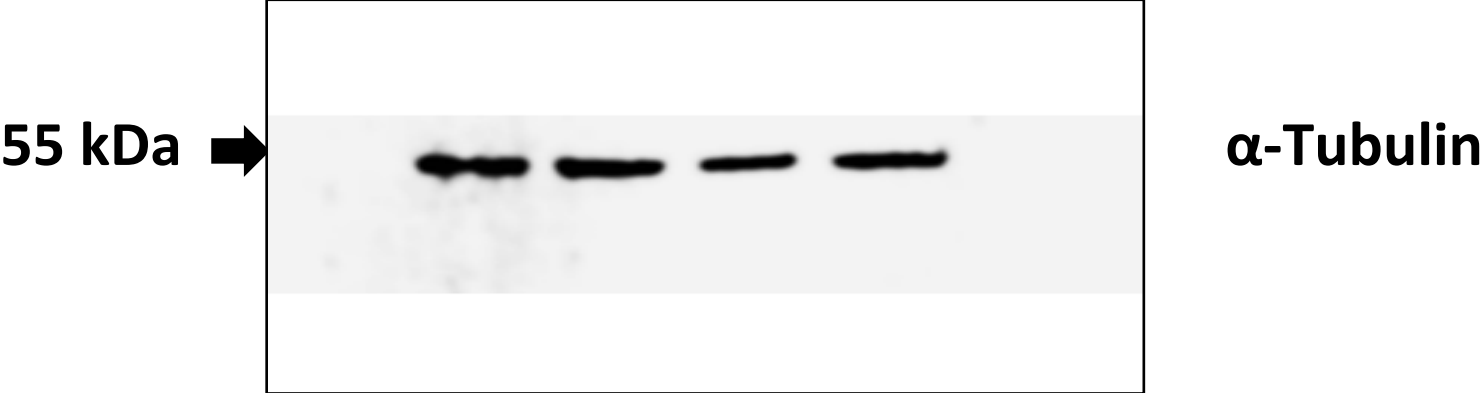

**Figure 4d: HIF-2 $\alpha$  and  $\alpha$ -Tubulin**

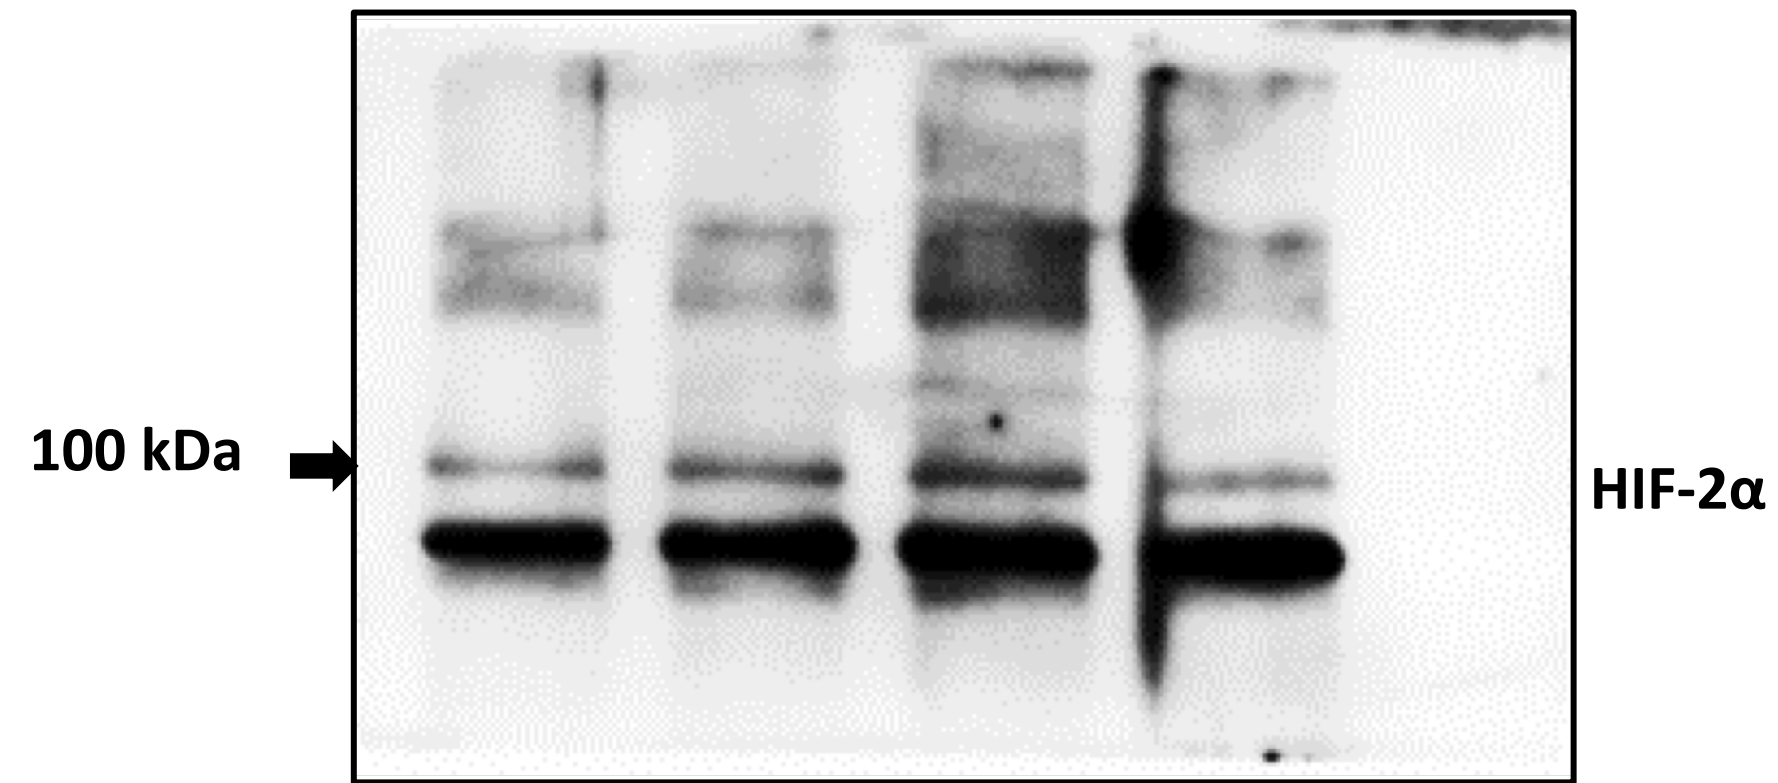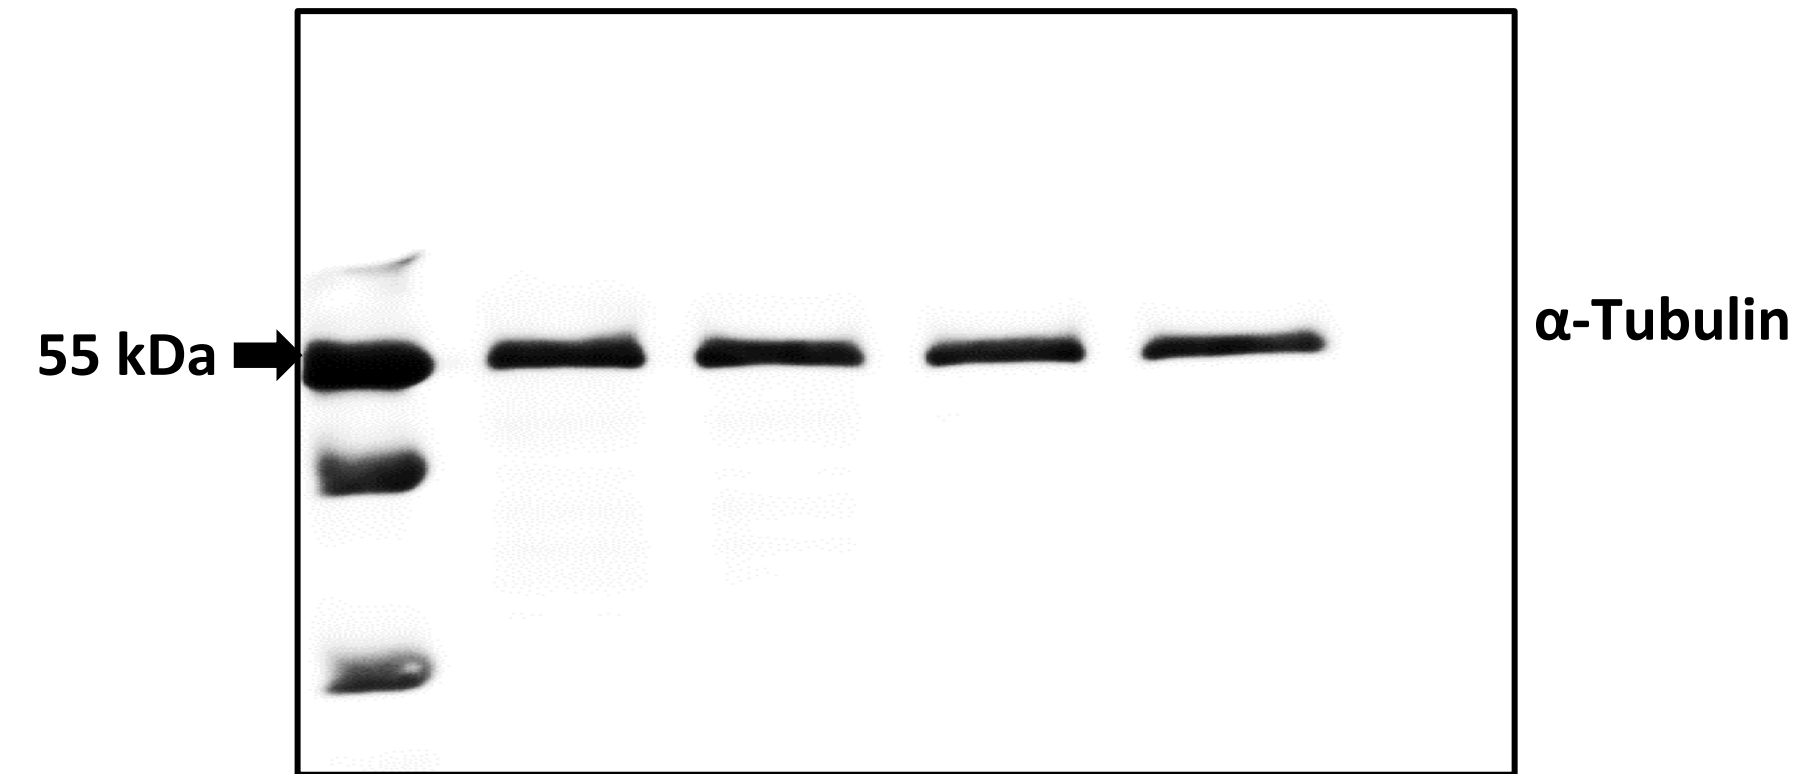



**Figure 4e:** HIF-2 $\alpha$ , p65, TBP and  $\alpha$ -Tubulin

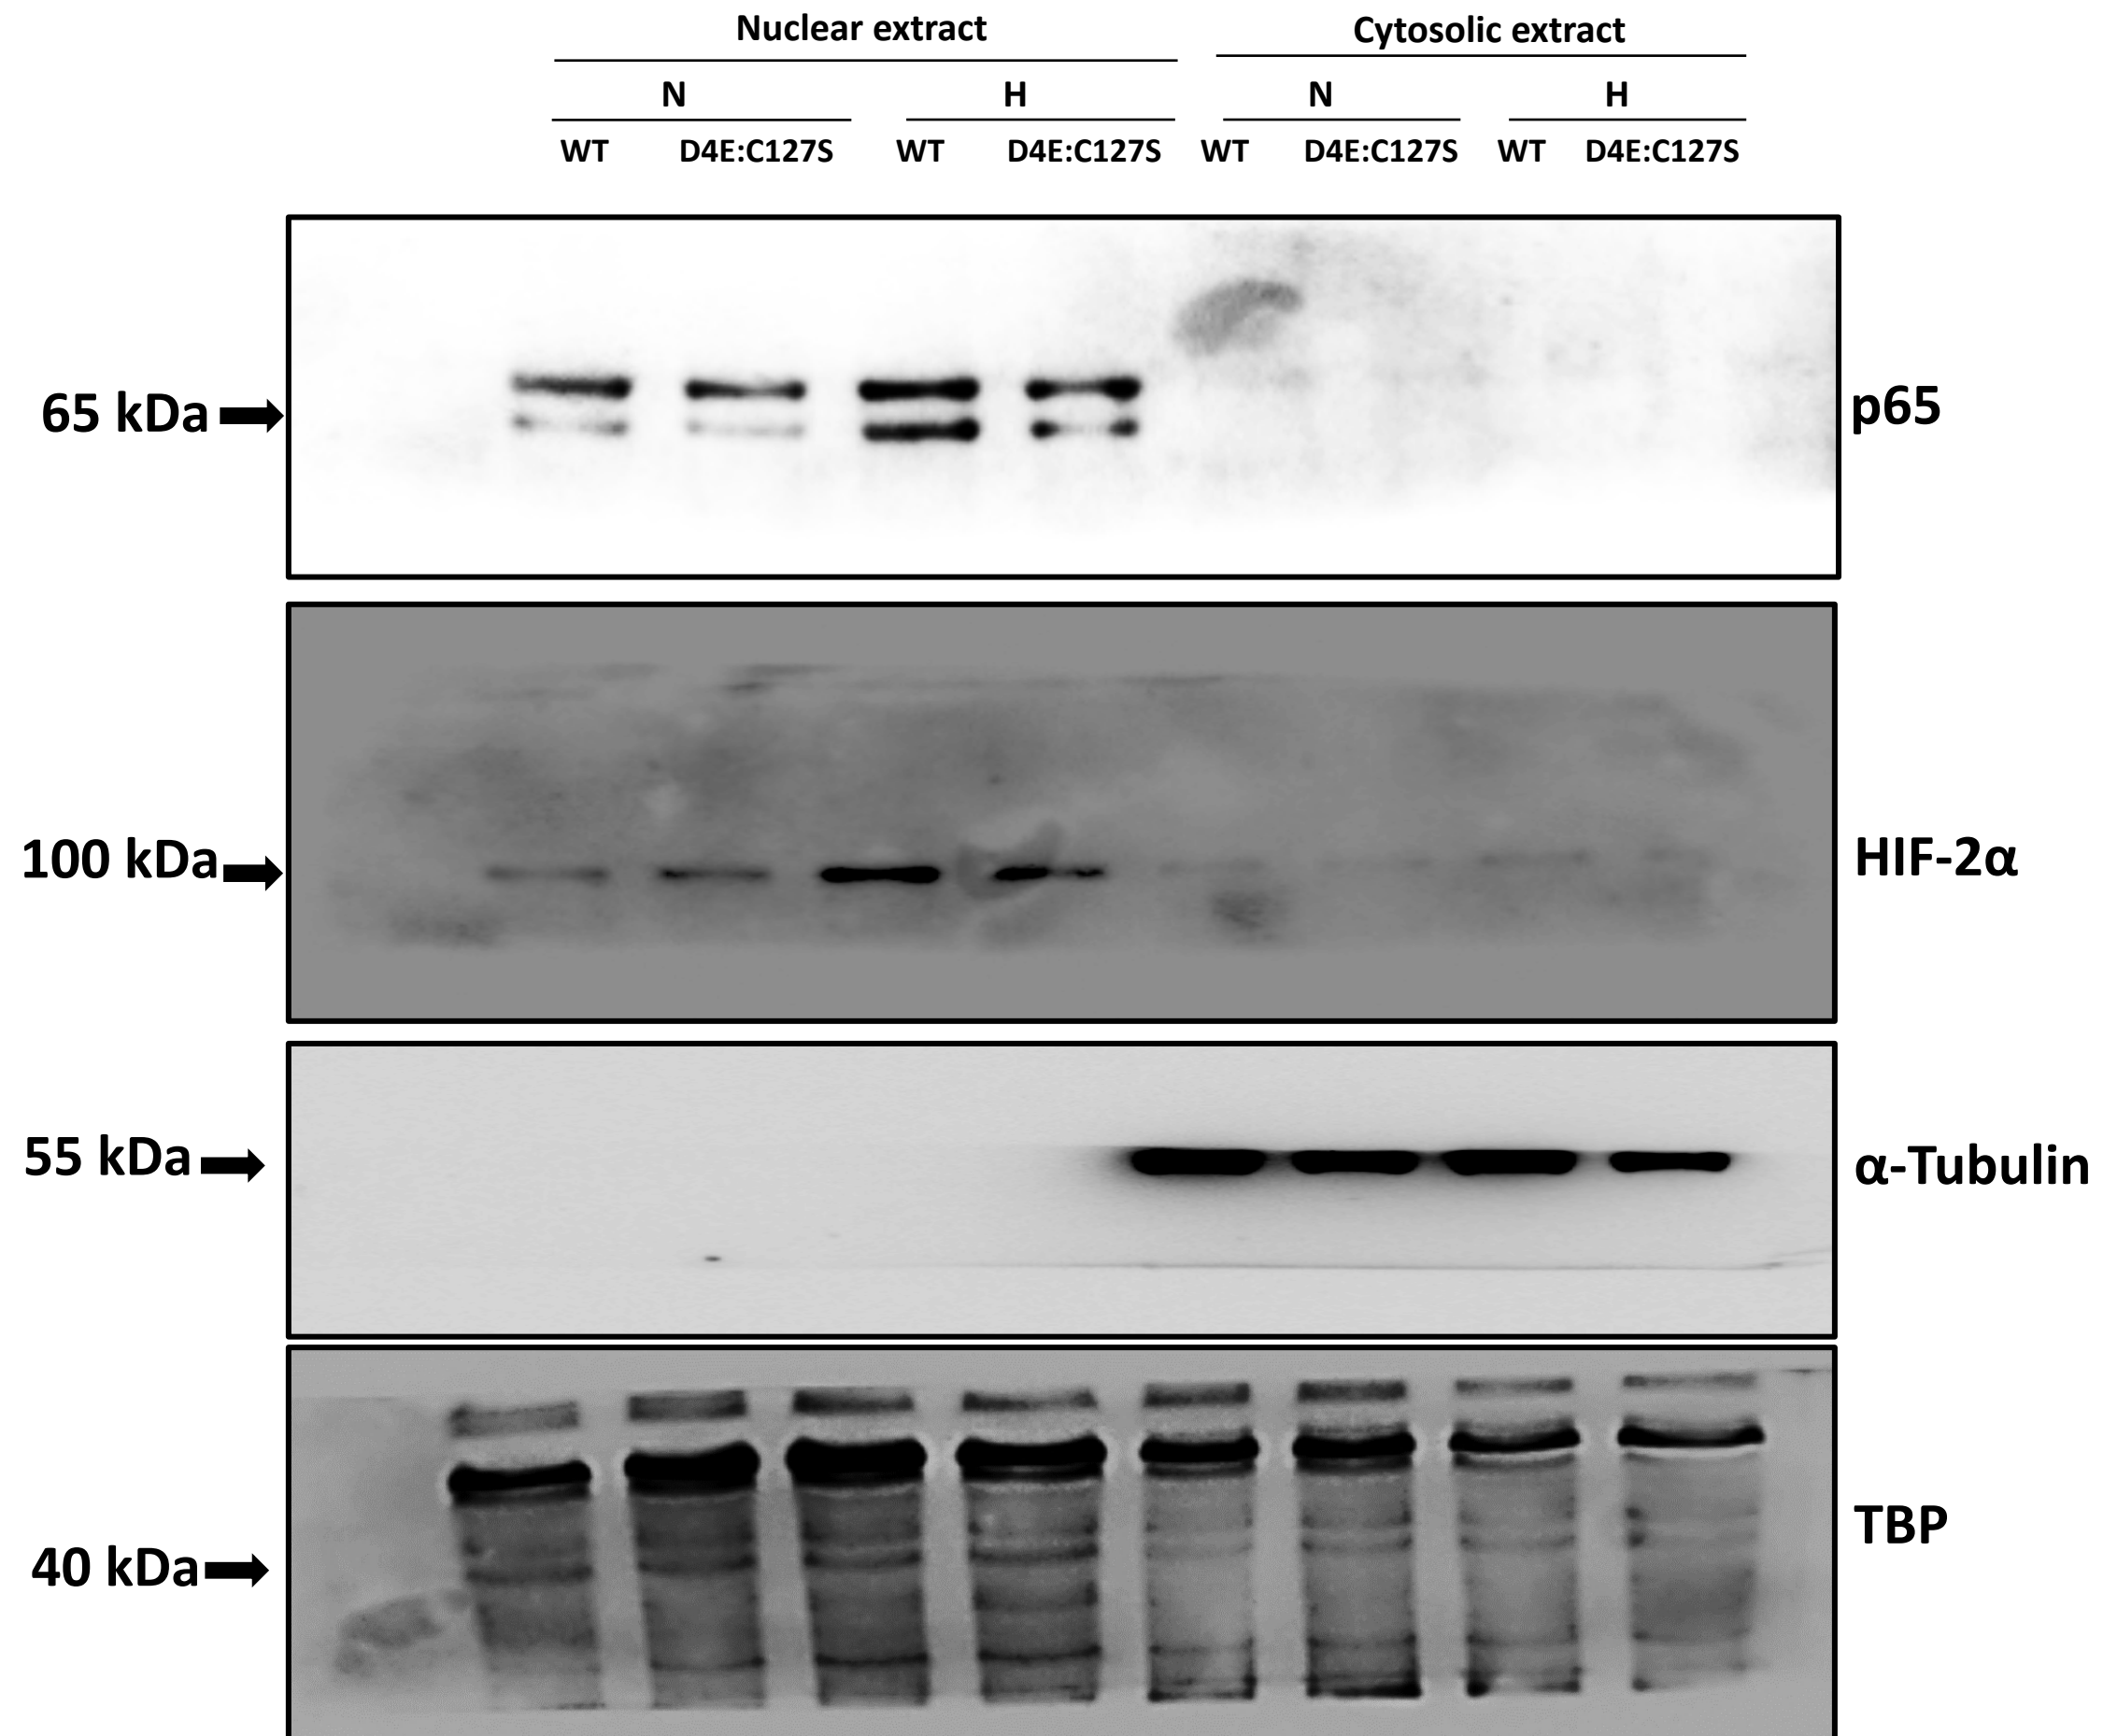

**Figure 6f: PHD2, HIF-1 $\alpha$ , HIF-2 $\alpha$ , p65, P-p65 and  $\alpha$ -Tubulin**

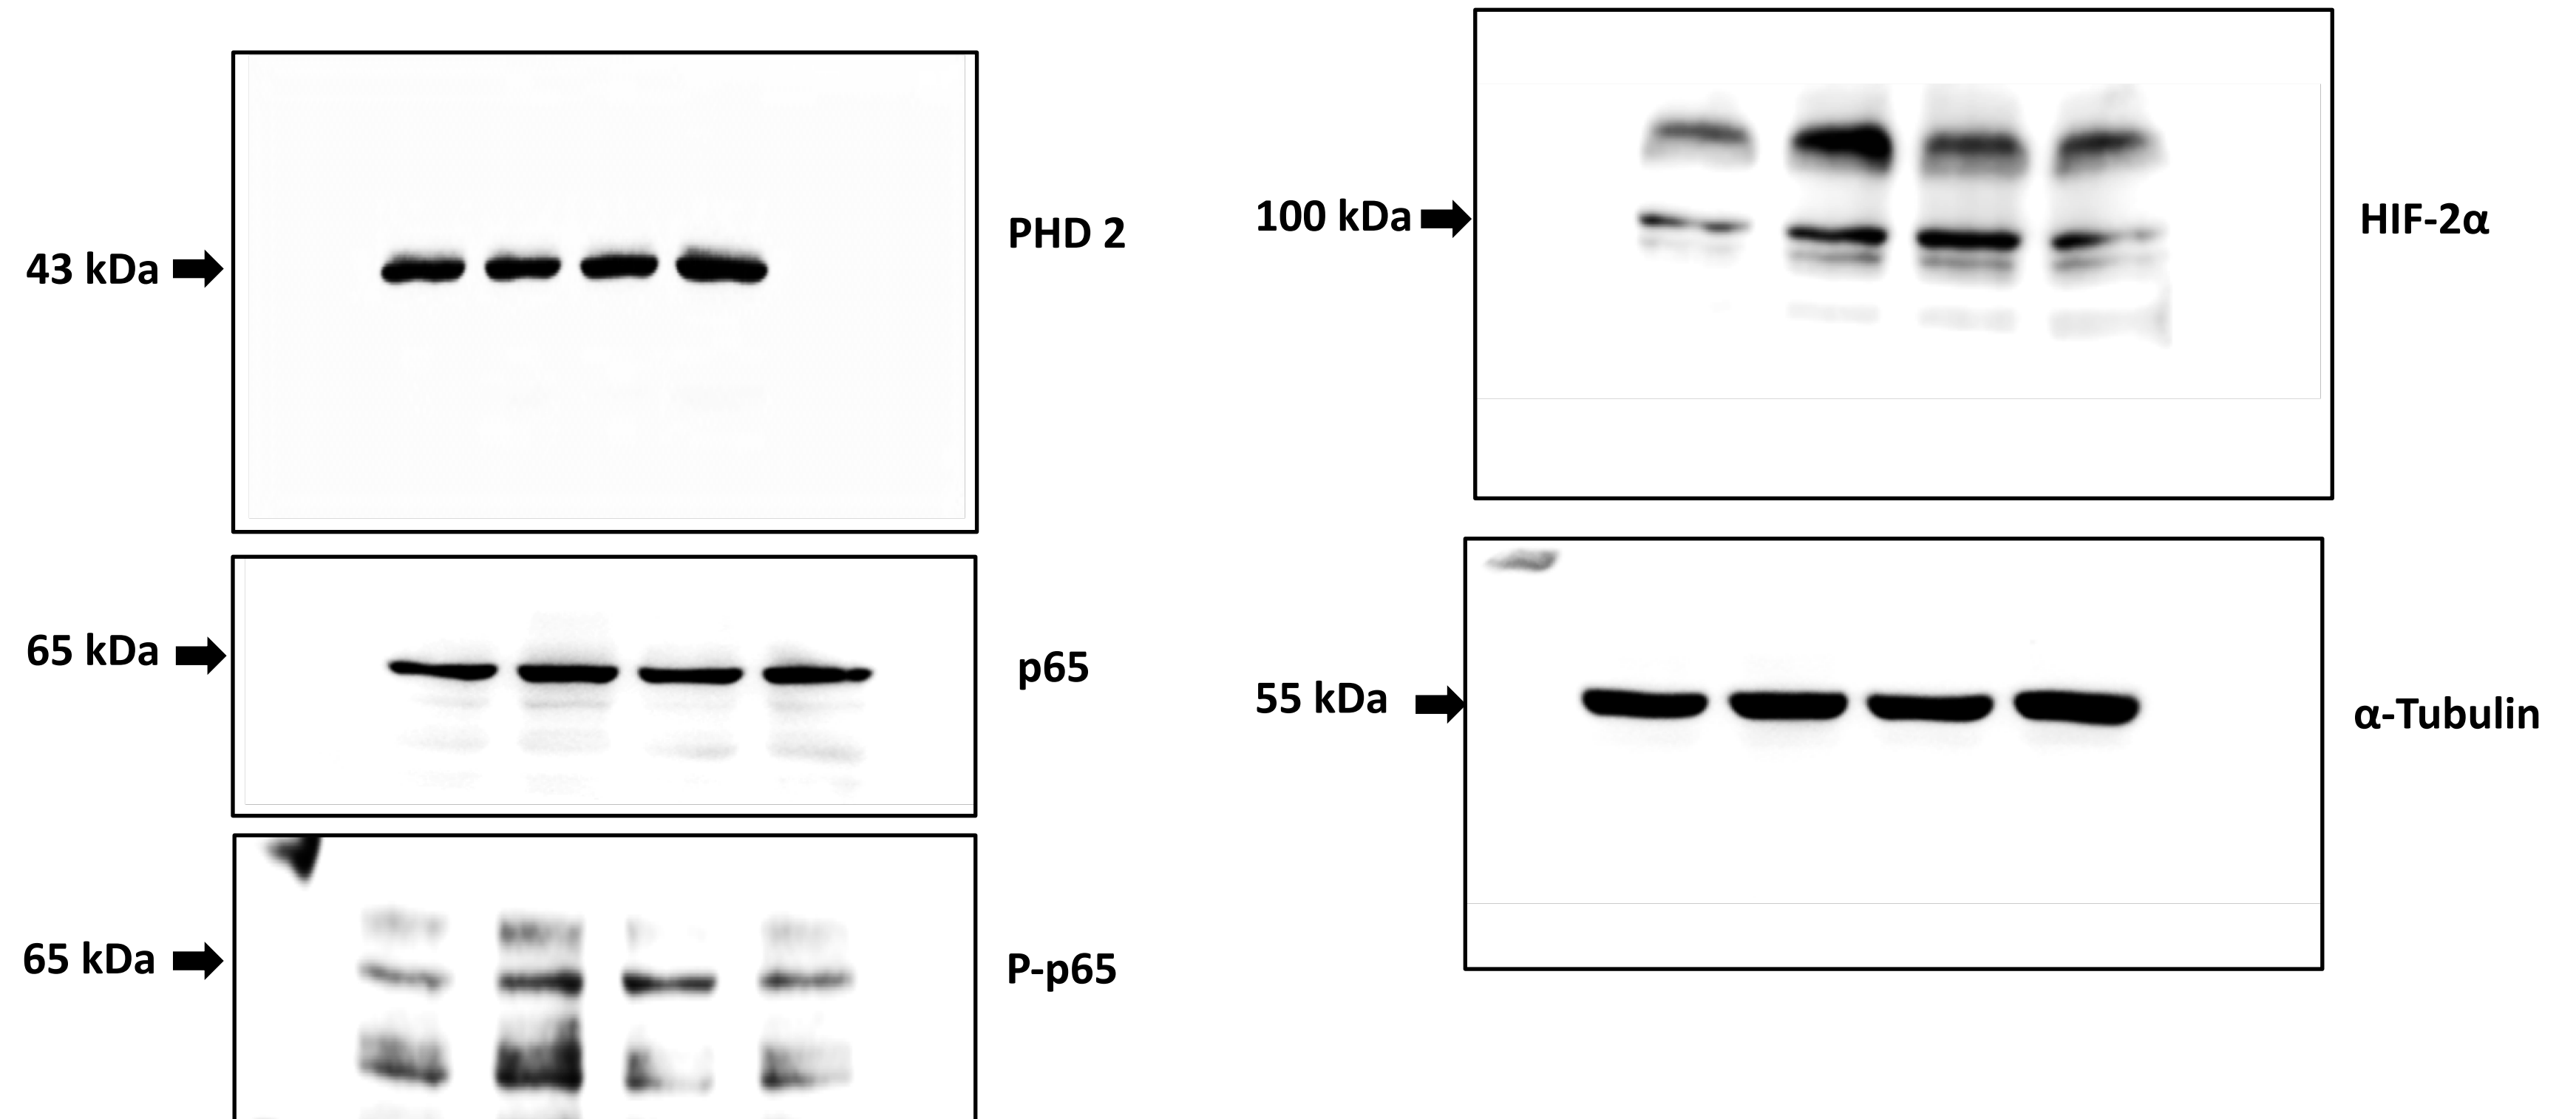

**Figure 7I: HIF-2 $\alpha$ , p65, P-p65 and  $\alpha$ -Tubulin**

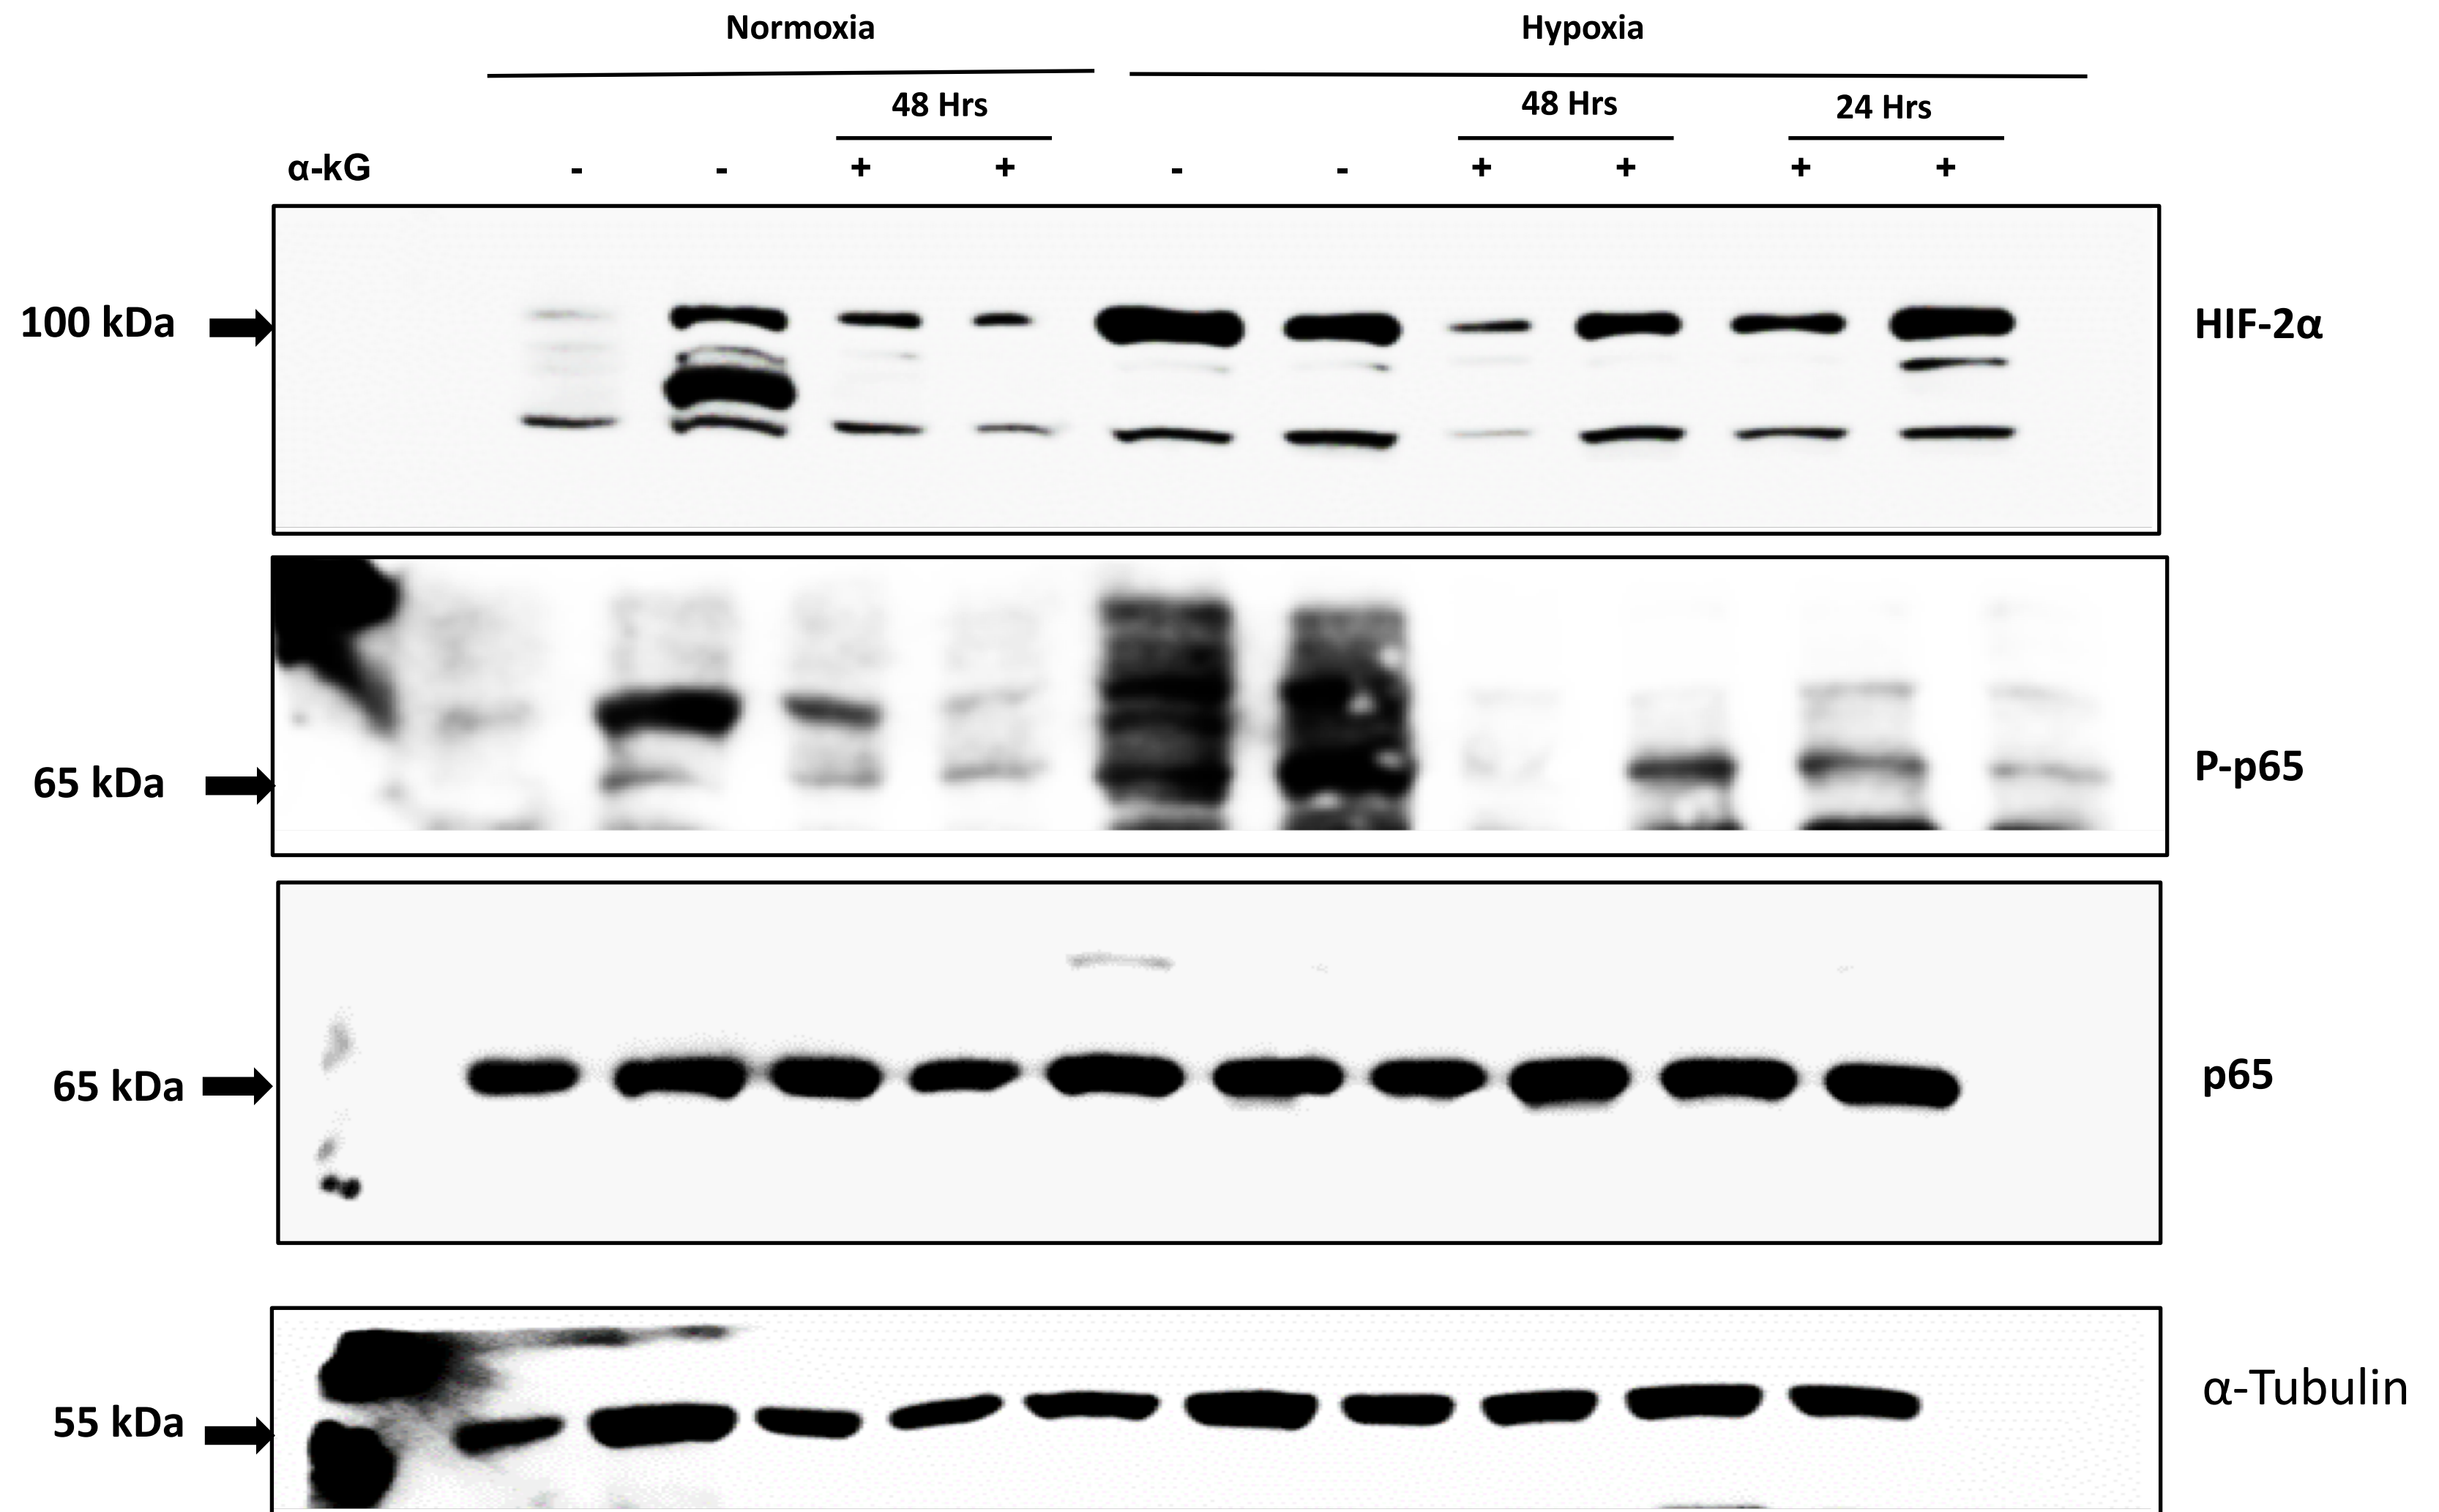

Supplement: mmc1.pdf [file mmc1.pdf]
